# Supplementary material for: Infiltrative coating of LiNi0.5Co0.2Mn0.3O2 microspheres with layer-structured LiTiO2: towards superior cycling performances for Li-ion batteries
Source: Royal Society of Chemistry journal article supplement (doi:10.1039/c4ta04196h), 2014-01-01
Supplement: c4ta04196h1.pdf [file c4ta04196h1.pdf]

Electronic Supplementary Material (ESI) for Journal of Materials Chemistry A.  
This journal is © The Royal Society of Chemistry 2014

## Electronic Supporting Information

### **Infiltrative coating of $\text{LiNi}_{0.5}\text{Co}_{0.2}\text{Mn}_{0.3}\text{O}_2$ microspheres with layer-structured $\text{LiTiO}_2$ : Toward superior cycling performances for Li-ion batteries**

Zongyi Wang, Sisi Huang, Baojun Chen, Hao Wu\* and Yun Zhang\*

*College of Materials Science and Engineering, Sichuan University, Chengdu 610065, P. R. China*

\* Corresponding Author. E-mail: hao.wu@scu.edu.cn and y\_zhang@scu.edu.cn

#### **Part I: Experimental Section**

##### **Material Synthesis**

**Preparation of  $\text{Ni}_{0.5}\text{Co}_{0.2}\text{Mn}_{0.3}(\text{OH})_2$  Microspheres.** Mesoporous  $\text{Ni}_{0.5}\text{Co}_{0.2}\text{Mn}_{0.3}(\text{OH})_2$  microspheres as precursors were first prepared by using a co-precipitation method. Typically,  $\text{NiSO}_4 \cdot 6\text{H}_2\text{O}$ ,  $\text{MnSO}_4 \cdot 5\text{H}_2\text{O}$ , and  $\text{CoSO}_4 \cdot 7\text{H}_2\text{O}$  were mixed with a molar ratio of Ni:Co:Mn=5:2:3 and with a concentration of 2.0 mol/L in distilled water. The mixed solution was put into a CSTR (continuous stirred tank reactor) with a capacity of 2 L under  $\text{N}_2$  atmosphere. Simultaneously, 2.0 mol/L solution of NaOH and 0.5 mol/L solution of  $\text{NH}_4\text{OH}$  as a chelating agent were separately fed into the continuous stirred tank reactor. The reaction was conducted at 50 °C for 10 h, and the pH value in solution was kept at 11. Afterwards, the co-precipitated powders were filtered, washed and finally dried at 140 °C for overnight to obtain the precursor  $\text{Ni}_{0.5}\text{Co}_{0.2}\text{Mn}_{0.3}(\text{OH})_2$  microspheres.

**Pre-coating Procedure.** A hydrolysis process of titanium salt was carried out to pre-coat  $\text{TiO}_2 \cdot x\text{H}_2\text{O}$  on the  $\text{Ni}_{0.5}\text{Co}_{0.2}\text{Mn}_{0.3}(\text{OH})_2$  microspheres. In a typical preparation of 1 mol% coated sample ( $\text{Ti}:(\text{Ni}+\text{Co}+\text{Mn}) = 1:100$  in molar ratio), 0.54 g  $\text{Ni}_{0.5}\text{Co}_{0.2}\text{Mn}_{0.3}(\text{OH})_2$  microspheres were firstly dispersed into 20 mL absolute ethanol, followed by addition of 0.020 g tetrabutyl titanate diluted in 0.4 mL absolute ethanol. The resulting suspension was kept stirring for 10 h to make sure the thorough mixing of microspheres with  $\text{Ti}(\text{OC}_4\text{H}_9)_4$ . Subsequently, a DI water-ethanol mixture (1:12 in volume) was added dropwise into the above suspension to trigger the hydrolysis reaction under vigorous stirring at ambient temperature. During the hydrolysis of  $\text{Ti}(\text{OC}_4\text{H}_9)_4$ , the precursor microspheres were gradually coated with the hydrolytic precipitate of hydrous titanium oxide. After stirring continuously for 24 h at the same temperature, the resulting products were washed with ethanol, and collected by centrifugation.

**Synthesis of  $\text{LiTiO}_2$ -coated  $\text{LiNi}_{0.5}\text{Co}_{0.2}\text{Mn}_{0.3}\text{O}_2$  Microspheres.** After pre-coating treatment, the coated microspheres were dispersed in ethanol, and mixed with about 0.22 g  $\text{Li}_2\text{CO}_3$ . The amount of  $\text{Li}_2\text{CO}_3$  is calculated by the following equation:

$$m_{\text{Li}_2\text{CO}_3} = 74\text{g} \cdot \text{mol}^{-1} \times [(n_{(\text{Ni}+\text{Co}+\text{Mn})} + n_{\text{Ti}})/2]$$

The mixture was stirred under 80 °C until it was dry. Then, the blend was collected and sintered at 850 °C for 12 hours, with heat rate of 4 °C·min<sup>-1</sup>.

**Synthesis of Pristine  $\text{LiNi}_{0.5}\text{Co}_{0.2}\text{Mn}_{0.3}\text{O}_2$  Microspheres.** For comparison, the uncoated pristine  $\text{LiNi}_{0.5}\text{Co}_{0.2}\text{Mn}_{0.3}\text{O}_2$  microspheres were also prepared by using  $\text{Ni}_{0.5}\text{Co}_{0.2}\text{Mn}_{0.3}(\text{OH})_2$  and  $\text{Li}_2\text{CO}_3$  as starting materials, and the sintering treatment was performed in the same procedure as described above.

## Characterization

Crystal structures of all samples were identified by powder X-ray diffraction measurement (XRD, D/Max-2000) using Cu K $\alpha$  radiation in the  $2\theta$  range of 10 – 70° with a step of 0.02° and a scanning speed of 0.06° s<sup>-1</sup>. Nitrogen sorption measurements were performed with Tristar 30 instrument (Micromeritics) to determine the specific surface area (SSA) and pore structure parameters of precursor  $\text{Ni}_{0.5}\text{Co}_{0.2}\text{Mn}_{0.3}(\text{OH})_2$  microspheres before and after  $\text{TiO}_2 \cdot x\text{H}_2\text{O}$  pre-coating. X-ray photoelectron spectroscopy (XPS, AXIS Ultra DLD, Kratos)

was used to characterize valence state of surface elements and their content in samples. The morphologies of all samples were observed by scanning electron microscope (SEM, S-4800). Also, energy dispersive X-ray spectroscopy (EDS) was carried out as the attachment of SEM, with the acceleration voltage of 20 kV, in order to analyze the surface component of samples. Transmission electron microscope (TEM, JEM-100CX, JEOL, Japan) and high resolution TEM (HRTEM, JEM-2100F, JEOL, Japan) were employed to distinguish the coating layer and identify the interplanar spacing.

### **Electrochemical Measurements**

The electrochemical properties of products were tested by CR2032 coin-type cell. The working electrodes were fabricated by dispersing 80 wt.% active materials, 15 wt.% black carbon (conductive materials), and 5 wt.% PVDF (binder) in N-methyl-2-pyrrolidone (NMP) solvent to form a homogeneous slurry. Afterwards, the slurry was coated on an Al foil current collector by an automatic coating machine (JFA-II, Tianjin Yonglida laboratory equipment Co., LTD.), and then dried at 120 °C for 10 h in a vacuum oven. All electrodes were cut into disks with a diameter of 14 mm, the average mass loading of which was about 5.0 mg·cm<sup>-2</sup>. Subsequently, CR-2032 coin-type cells were assembled in an argon-filled glove box by utilizing the above prepared disks as cathode, metal lithium foils as anode, polypropylene micro-porous films (Celgard 2400) as separator, and 1M LiPF<sub>6</sub> dissolved in a mixture of ethylene carbonate (EC) and dimethyl carbonate (DMC) and diethyl carbonate (DEC) (1:1:1 in volume) as electrolyte. Galvanostatic charge and discharge tests were conducted in a potential range of 3.0–4.4 V (*vs.* Li/Li<sup>+</sup>) at 25 and 55 °C using a battery system (Neware CT-3008W battery tester, China). The Electrochemical impedance spectroscopy (EIS) tests were performed by the CHI600D electrochemical workstation in the frequency range of 100 kHz to 10 mHz with the scanning rate of 0.1 mV/s.

## Part II: Supporting Figures and Tables

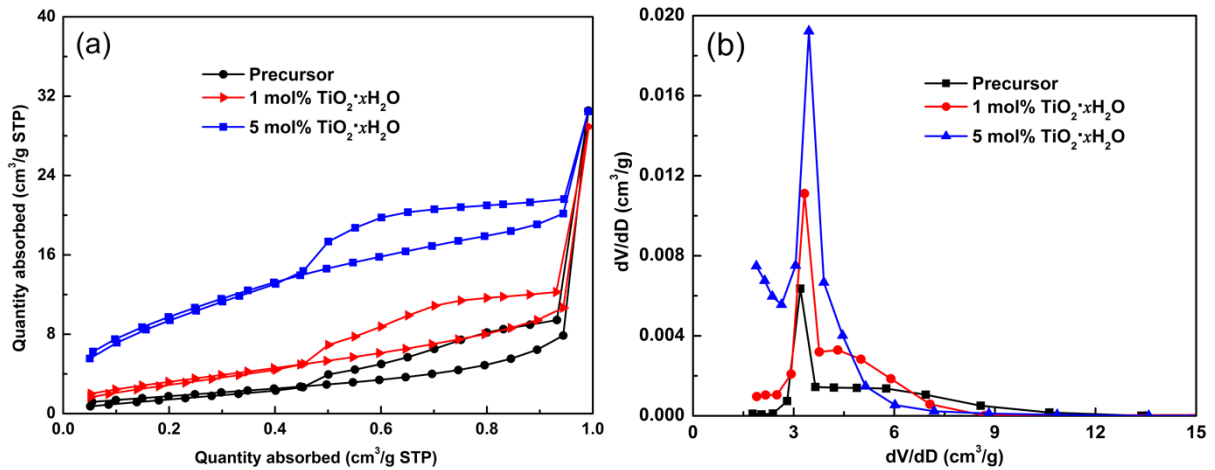

**Fig. S1** (a) N<sub>2</sub> adsorption/desorption isotherms and (b) pore size distribution curves of precursor Ni<sub>0.5</sub>Co<sub>0.2</sub>Mn<sub>0.3</sub>(OH)<sub>2</sub> microspheres before and after 1 and 5 mol% TiO<sub>2</sub>·xH<sub>2</sub>O pre-coating

As shown in Fig. S1a, the precursor Ni<sub>0.5</sub>Co<sub>0.2</sub>Mn<sub>0.3</sub>(OH)<sub>2</sub> microsphere displays the type IV isotherm with a clear hysteresis loops, indicating the presence of mesoporous structure. The Brunauer-Emmett-Teller (BET) surface area of the precursor was calculated to be 6.9 m<sup>2</sup>/g, while its Barrett-Joyner-Halenda (BJH) pore size distribution derived from the desorption isotherm centered at around 14.1 nm, attributing to the interstitial spacings between the stacked flake-like primary particles. After pre-coating with 1 and 5 mol% TiO<sub>2</sub>·xH<sub>2</sub>O, the pore size of the precursor decreased to be 9.2 and 4.8 nm, respectively, accompanied by increased BET surface area of 12.7 and 37.9 m<sup>2</sup>/g, respectively, mainly due to the uniform and complete deposition of TiO<sub>2</sub>·xH<sub>2</sub>O into the pores throughout the entire microspheres.

**Table S1.** Summary of BET specific surface area and BJH pore structure parameters

| Sample                                             | BET SSA (m <sup>2</sup> /g) | Average pore size (nm) | Pore volume (cm <sup>3</sup> /g) |
|----------------------------------------------------|-----------------------------|------------------------|----------------------------------|
| Precursor                                          | 6.9                         | 14.1                   | 0.047                            |
| 1 mol% TiO <sub>2</sub> ·xH <sub>2</sub> O coating | 12.7                        | 9.2                    | 0.044                            |
| 5 mol% TiO <sub>2</sub> ·xH <sub>2</sub> O coating | 37.9                        | 4.8                    | 0.042                            |

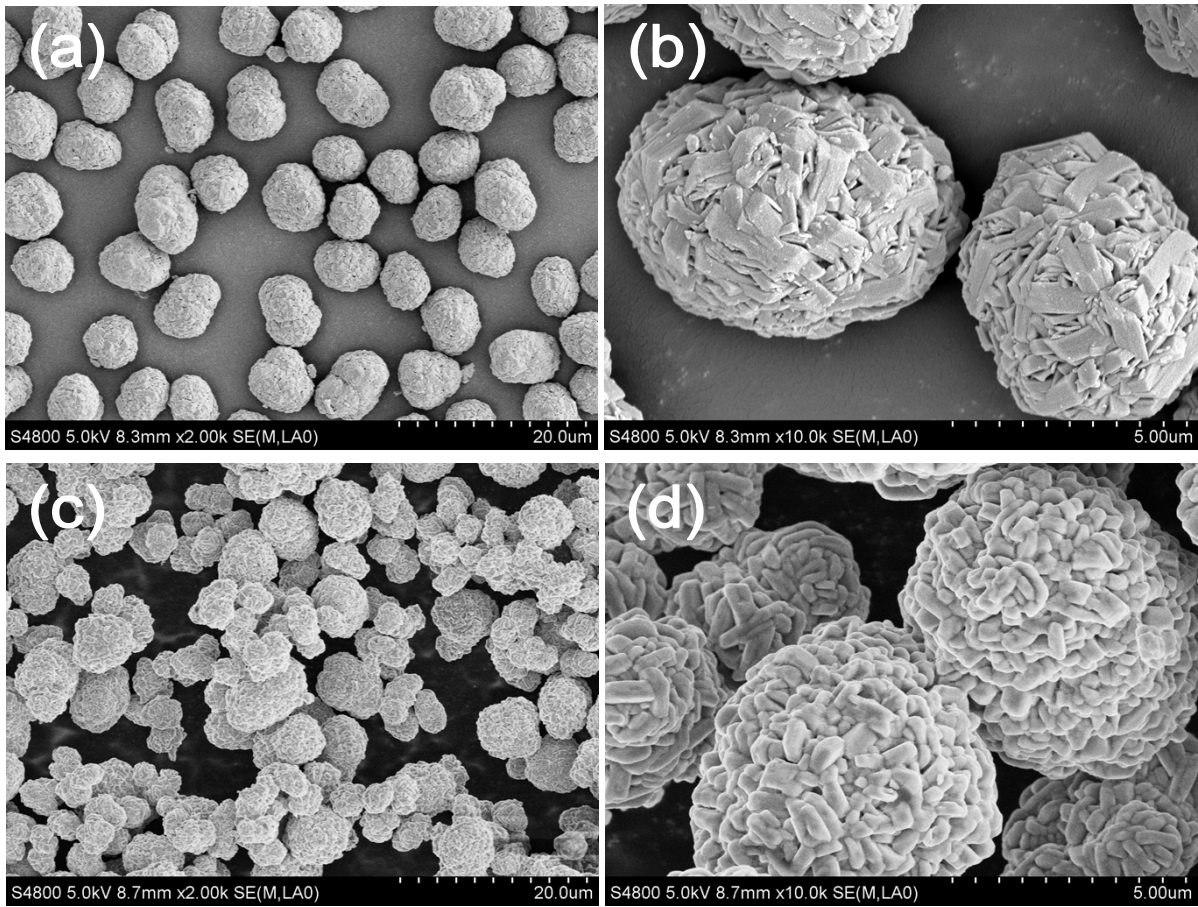

**Fig. S2** SEM images of (a and b)  $\text{Ni}_{0.5}\text{Co}_{0.2}\text{Mn}_{0.3}(\text{OH})_2$  microspheres and (c and d) corresponding pristine LNCM product at low and high magnification

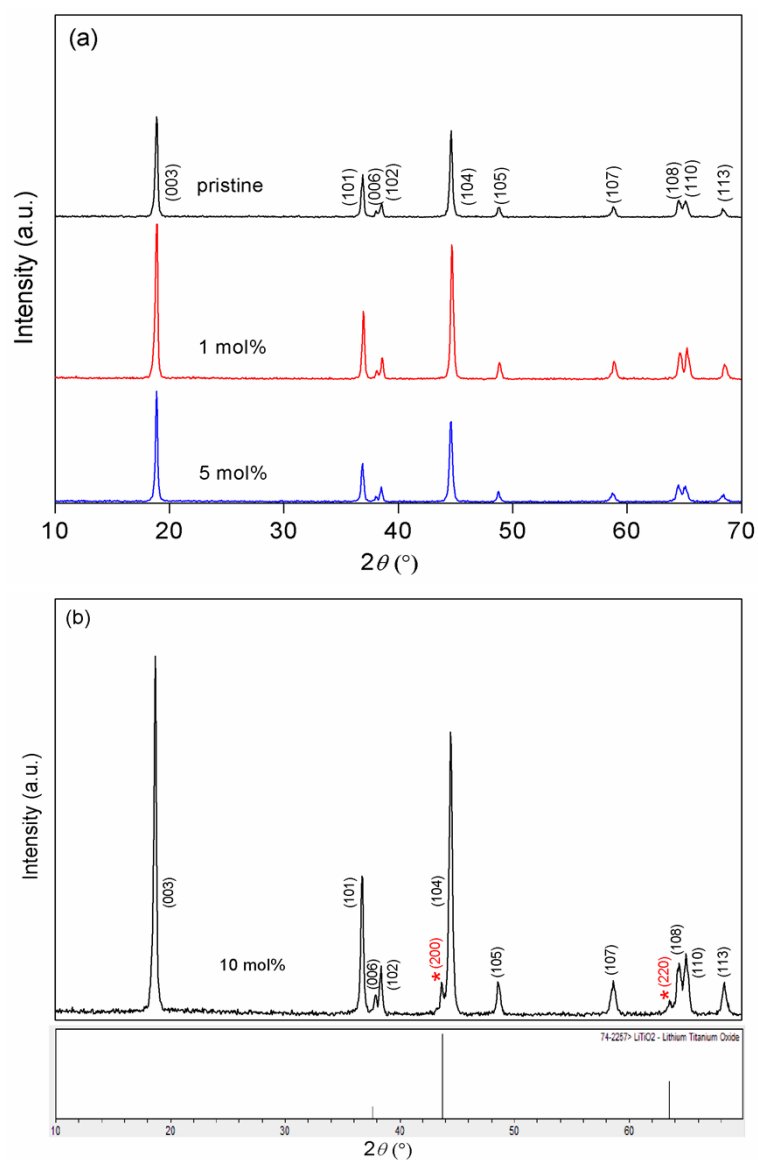

**Fig. S3** XRD patterns of (a) pristine and LiTiO<sub>2</sub>-coated LNCM product (1 and 5 mol% coating content) and (b) 10 mol% LiTiO<sub>2</sub>-coated LNCM product

**Table S2.** Riveted cell refinement results of the pristine and LiTiO<sub>2</sub>-coated LNCM products

| Sample             | Space group | $a$ (Å) | Vol. (Å <sup>3</sup> ) |
|--------------------|-------------|---------|------------------------|
| Pristine           | $R-3m$      | 2.86118 | 100.66                 |
| 1 mol% coated LNCM | $R-3m$      | 2.86203 | 100.89                 |
| 5 mol% coated LNCM | $R-3m$      | 2.86316 | 101.24                 |

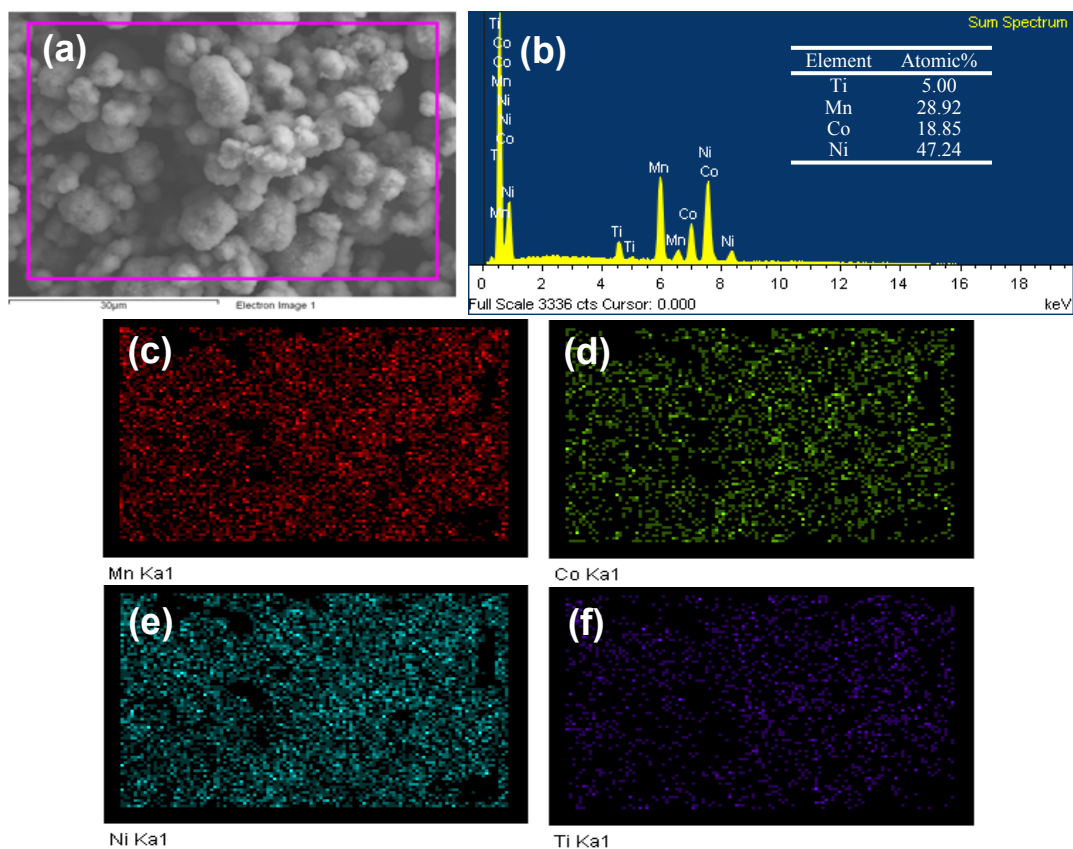

**Fig. S4** (a) SEM image and (b) EDS spectrum of 5 mol% LiTiO<sub>2</sub>-coated LNCM. (c–f) EDS dot-mapping results of Mn (c), Co (d), Ni (e), and Ti (f)

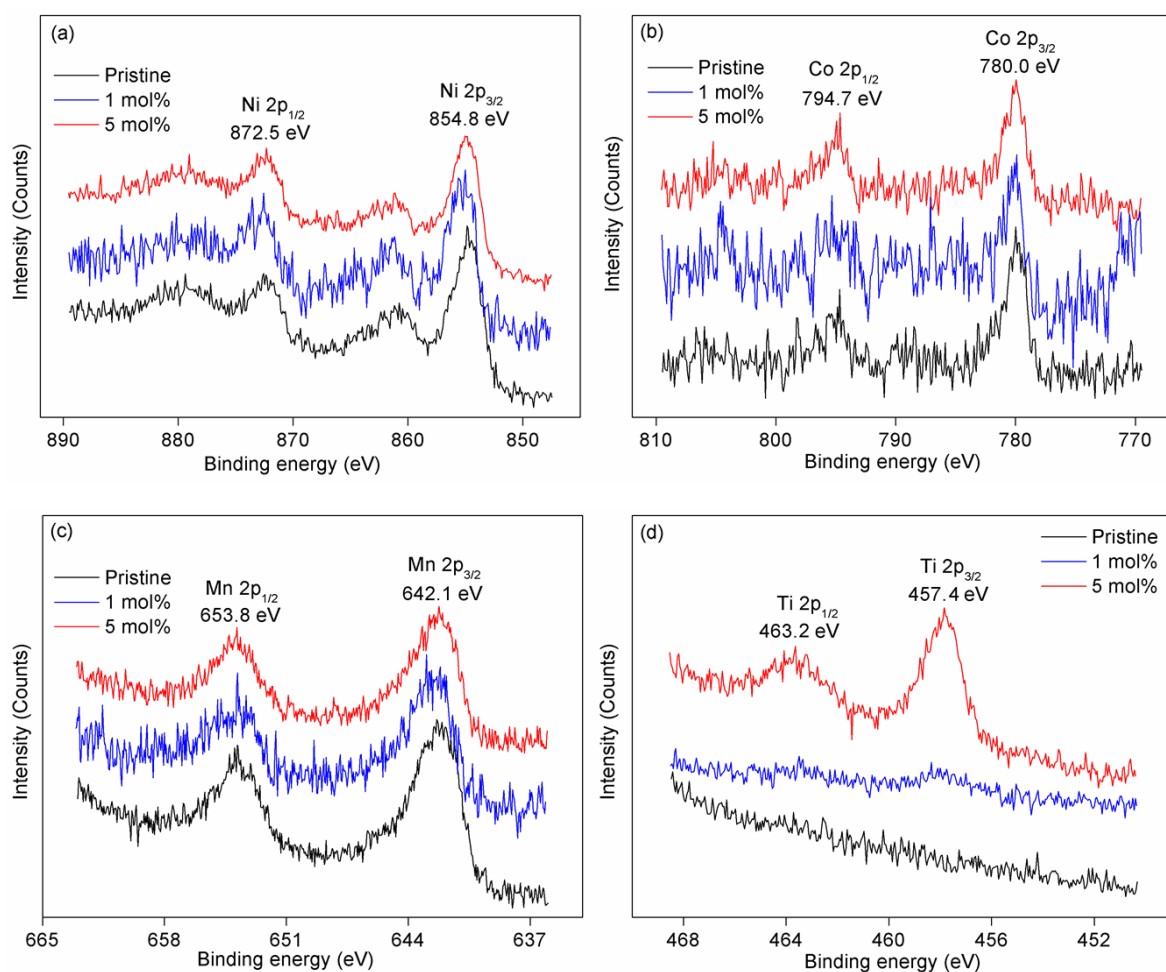

**Fig. S5** XPS spectra for (a) Ni, (b) Co, (c) Mn, and (d) Ti elements of pristine, 1, and 5 mol%

LiTiO<sub>2</sub>-coated LNCM products

**Table S32.** Summary of atomic ratio of Ti to (Ni+Co+Mn) of products determined from XPS and from precursor applied in the synthetic process.<sup>a</sup>

| Samples  | Ti:(Ni+Co+Mn) |                |
|----------|---------------|----------------|
|          | XPS results   | Starting ratio |
| Pristine | 0:(49+19+32)  | 0:(50+20+30)   |
| 1 mol%   | 3:(51+15+34)  | 1:(50+20+30)   |
| 5 mol%   | 14:(53+12+36) | 5:(50+20+30)   |

<sup>a</sup> The results of XPS element qualification was calculated and analyzed according to the method described in the literature.<sup>S1,2</sup>



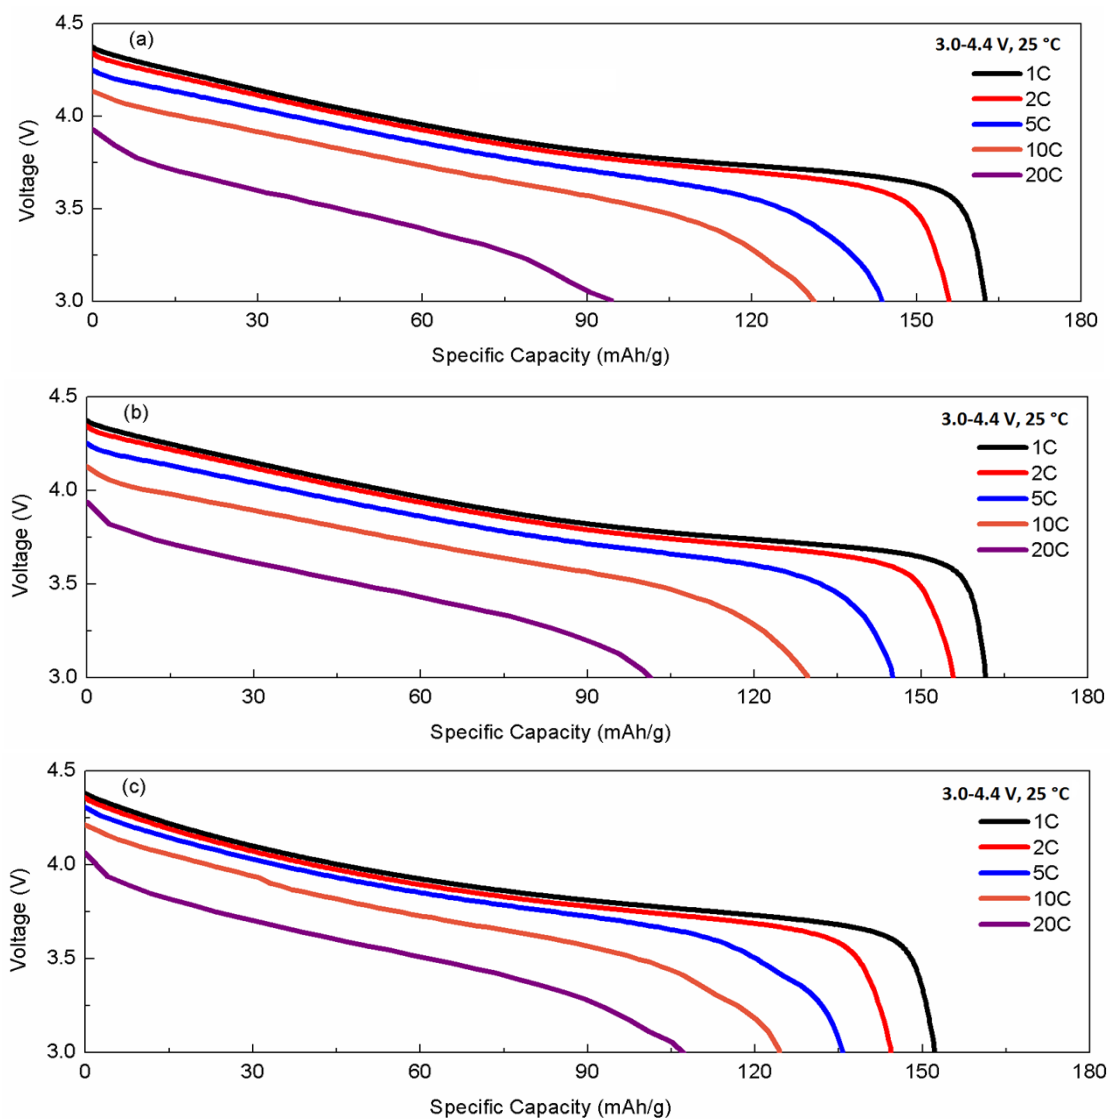

**Fig. S6** Typical discharge voltage-capacity profiles of (a) pristine, (b) 1, and (c) 5 mol%  $\text{LiTiO}_2$ -coated LNCM products at variable current rate of 1, 2, 5, 10, and 20 C

**Table S43.** Discharge capacity of the products at variable current rate

| Samples  | Discharge capacity (mA h/g) |       |       |       |       | Back to 1 C |
|----------|-----------------------------|-------|-------|-------|-------|-------------|
|          | 1 C                         | 2 C   | 5 C   | 10 C  | 20 C  |             |
| Pristine | 163.8                       | 155.8 | 144.9 | 131.4 | 94.4  | 163.3       |
| 1 mol%   | 162.4                       | 155.9 | 143.7 | 129.6 | 101.3 | 161.7       |
| 5 mol%   | 151.3                       | 144.4 | 135.8 | 124.9 | 107.2 | 150.5       |

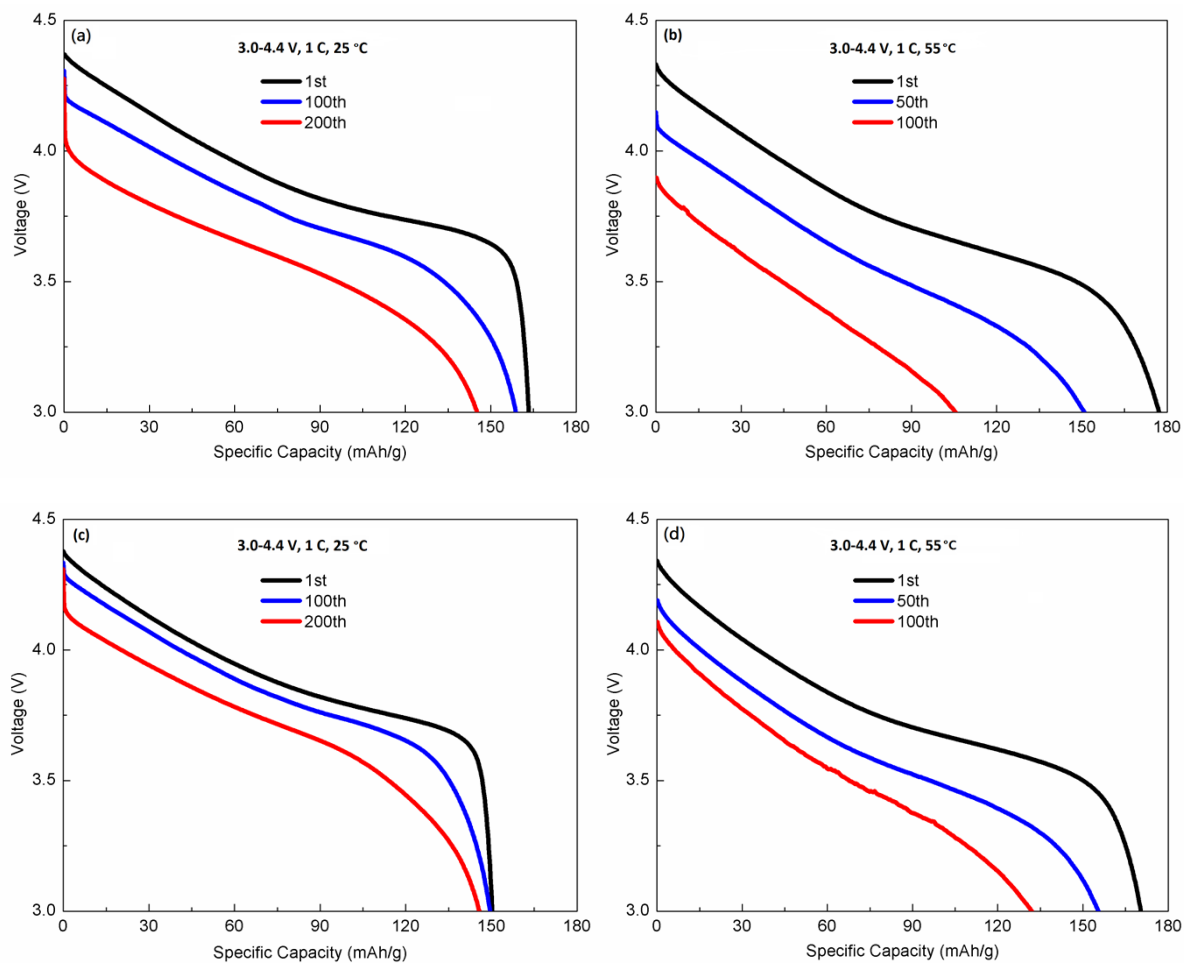

**Fig. S7** Typical discharge voltage-capacity profiles of (a and b) 1 and (c and d) 5 mol%  $\text{LiTiO}_2$ -coated LNCM at the different cycle numbers under 25 (a and c) and 55 °C (b and d)

**Table S54.** Capacity retention of the products after cycling at 1 C under 25 and 55 °C

| Samples                                 | 25 °C    |        |        | 55 °C    |        |        |
|-----------------------------------------|----------|--------|--------|----------|--------|--------|
|                                         | Pristine | 1 mol% | 5 mol% | Pristine | 1 mol% | 5 mol% |
| Initial capacity (mA h/g)               | 167.4    | 163.3  | 150.1  | 181.1    | 177.1  | 170.7  |
| The 100 <sup>th</sup> capacity (mA h/g) | 142.5    | 158.7  | 149.5  | 51.2     | 106.5  | 131.5  |
| The 200 <sup>th</sup> capacity (mA h/g) |          | 145.4  | 145.9  |          |        |        |
| Final capacity retention (%)            | 85.1     | 89.1   | 97.2   | 28.3     | 60.1   | 77.0   |

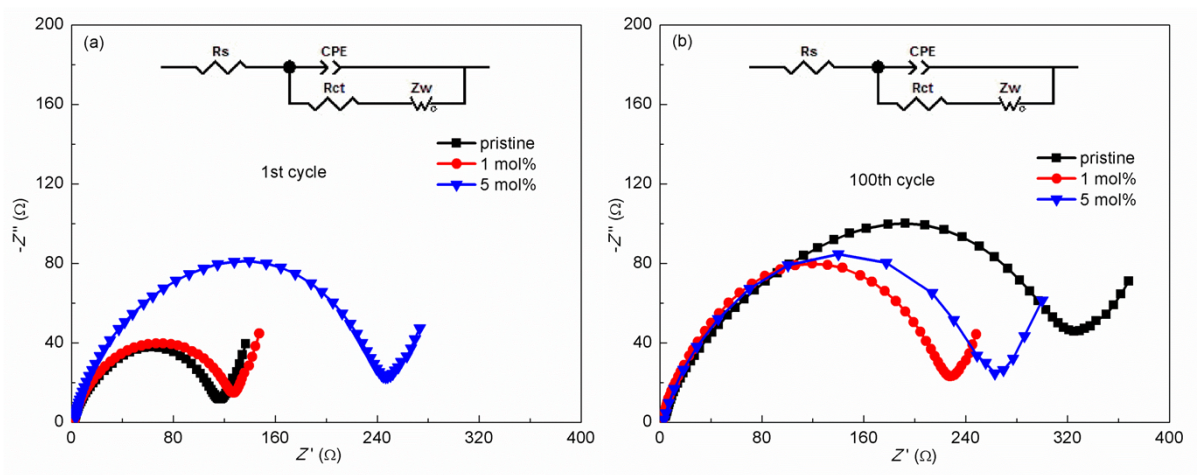

**Fig. S8** Nyquist plots of the pristine and LiTiO<sub>2</sub>-coated LNCM electrodes at a charge state of 4.4 V in the (a) 1<sup>st</sup> and (b) 100<sup>th</sup> cycle at 1 C under 25 °C; Insets in (a) and (b) show the equivalent circuit used to fit the measured impedance spectra

**Table S65.** The values of  $R_s$  and  $R_{ct}$  for pristine and LiTiO<sub>2</sub>-coated LNCM products in the 1<sup>st</sup> and 100<sup>th</sup> cycle at 1 C under 25 °C

| Samples  | 1 <sup>st</sup> cycle |              | 100 <sup>th</sup> cycle |              |
|----------|-----------------------|--------------|-------------------------|--------------|
|          | $R_s$ (Ω)             | $R_{ct}$ (Ω) | $R_s$ (Ω)               | $R_{ct}$ (Ω) |
| Pristine | 1.94                  | 109.3        | 2.64                    | 340.5        |
| 1 mol%   | 1.83                  | 109.4        | 1.86                    | 211.6        |
| 5 mol%   | 2.16                  | 218.4        | 2.52                    | 223.8        |

As described in Table S65, the  $R_s$  values representing the solution resistance, for all electrodes have no distinct changes during cycling process, which can be ascribed to the slow decomposition of electrolyte solution with cycles.<sup>S3</sup> Contrarily, all the three electrodes demonstrated increasing  $R_{ct}$  values, which refers to charge transfer resistance,<sup>S3</sup> upon continuous cycling. This phenomenon can be associated to the fact that the thicker solid electrolyte interphase (SEI) film on the electrode surface increased the electrochemical kinetics obstacles. It can be seen that the increase of  $R_{ct}$  values between the pristine and coated

electrodes became different as the cycle reached to the 100<sup>th</sup>. The ever-growing interface reaction between the electrolyte and electrode can be significantly responsible for the increase of  $R_{ct}$  values. Specifically, the  $R_{ct}$  value of the pristine LNCM electrode increased from 109.3 $\Omega$  at the 1<sup>st</sup> cycle to 340.5  $\Omega$  at the 100<sup>th</sup> cycle, whereas the  $R_{ct}$  values of the 1 and 5 mol% LiTiO<sub>2</sub>-coated electrodes only increased from 109.4 and 218.4  $\Omega$  at the 1<sup>st</sup> cycle to 211.6 and 223.8  $\Omega$  at the 100<sup>th</sup> cycle, respectively. Clearly, the LiTiO<sub>2</sub>-coated electrodes showed much smaller resistance increase than that of the pristine one. This fact suggests that LiTiO<sub>2</sub> acts as a role of a protective layer to restrain the oxidation of electrolyte and structural destruction of electrode material at high cut-off voltage so as to avoid the over-rapid thickening of electronically insulating SEI film,<sup>S4</sup> and decrease the rate of impedance increase during long-term cycling.

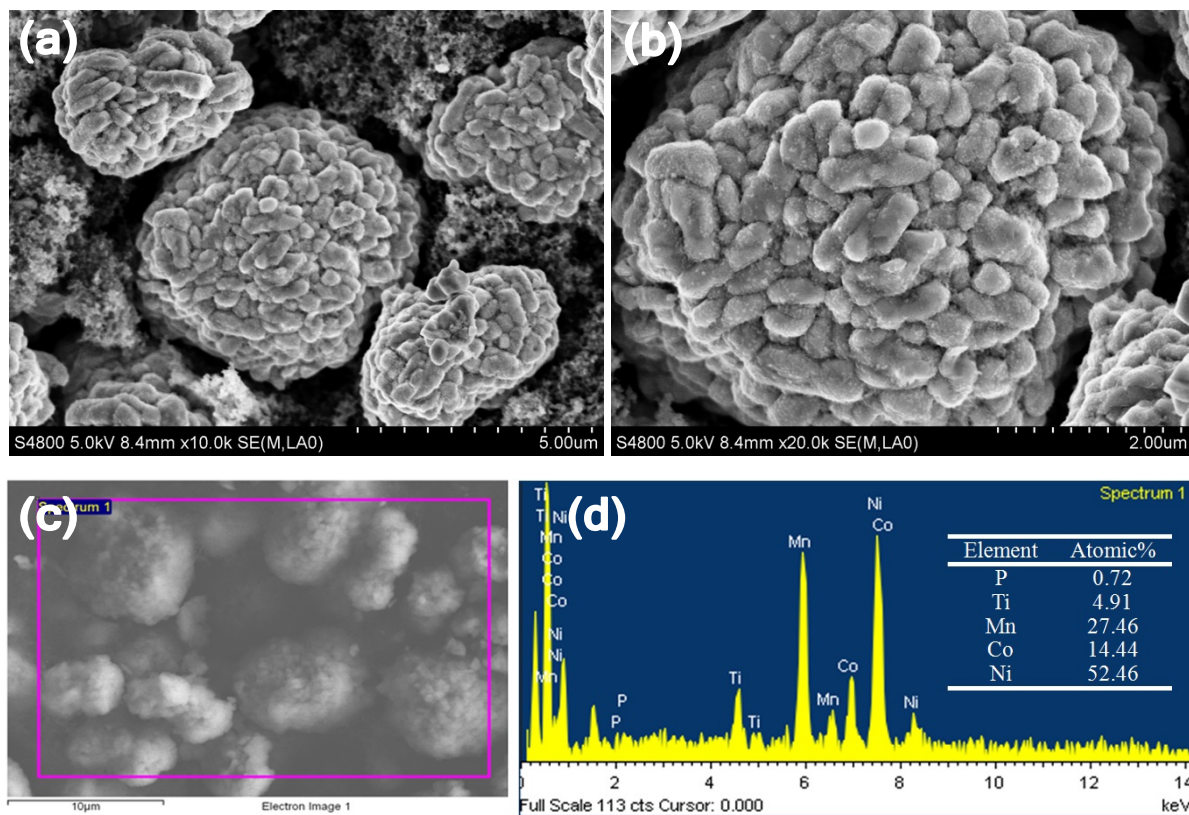

**Fig. S9** SEM images (a and b) and EDS spectrum (c and d) of the 5 mol%  $\text{LiTiO}_2$ -coated LNCM electrode after 100 cycles at 1 C under 25 °C

## Reference

[S1]. B. Philippe, R. Dedryvere, J. Allouche, F. Lindgren, M. Gorgoi, H. Rensmo, D. Gonbeau and K. Edstrom, *Chem. Mater.*, 2012, **24**, 1107.

[S2]. J. Lu, Q. Peng, W. Y. Wang, C. Y. Nan, L. H. Li and Y. D. Li, *J. Am. Chem. Soc.*, 2013, **135**, 1649.

[S3]. J. M. Zheng, X. B. Wu and Y. Yang, *Electrochim. Acta*, 2011, **56**, 3071.

[S4]. S. K. Martha, J. Nanda, G. M. Veith and N. J. Dudney, *J. Power Sources*, 2012, **216**, 179.
